# Supplementary material
Source: HighWire-hosted journal article supplement (http://www.ajnr.org/highwire/filestream/86844/field_highwire_adjunct_files/0/20-00842_.pdf)
Supplement: 20-00842_.pdf [file 20-00842_.pdf]

**Online Table 1: Univariable analysis of predictors for incomplete occlusion (n = 105)<sup>a</sup>**

| Parameter                  | P Value |
|----------------------------|---------|
| Age ( $\geq$ 60 years)     | .002    |
| Sex                        | .93     |
| Nonsmoker                  | .38     |
| Fusiform                   | .012    |
| Branching artery from dome | <.001   |
| Complications              | .42     |
| Maximum dome diameter      | .18     |
| Neck diameter              | .33     |
| Height                     | .21     |
| Dome/neck ratio            | .91     |
| ASPECTS ratio              | .21     |
| Adjunctive coil            | .48     |
| Saccular aneurysm type     | <.001   |

<sup>a</sup>Statistically significant predictors were age older than 60 years, fusiform aneurysm, branching artery from the dome, and saccular aneurysm type.

**Online Table 2: Number of occlusions by aneurysm type (n = 105)**

|                          | Complete Occlusion | Incomplete Occlusion |
|--------------------------|--------------------|----------------------|
| Outer convexity (n = 35) | 15                 | 20                   |
| Inner convexity (n = 29) | 28                 | 1                    |
| Lateral wall (n = 34)    | 30                 | 4                    |
| Fusiform (n = 7)         | 1                  | 6                    |

**Online Table 3: Prior reports on predictors of complete/incomplete occlusion treated by using the Pipeline Embolization Device**

| Factors                                                           | Authors                                                                                                                                                                    | Pertinent Negative                                                                                                                                                                                                                                 |
|-------------------------------------------------------------------|----------------------------------------------------------------------------------------------------------------------------------------------------------------------------|----------------------------------------------------------------------------------------------------------------------------------------------------------------------------------------------------------------------------------------------------|
| Demographic factors                                               |                                                                                                                                                                            |                                                                                                                                                                                                                                                    |
| Incomplete occlusion                                              |                                                                                                                                                                            |                                                                                                                                                                                                                                                    |
| Age ≥ 70 years, nonsmoker, short follow-up period                 | Adeeb et al, 2017 <sup>10</sup>                                                                                                                                            | PcomA aneurysm, posterior circulation, maximum diameter of 21 mm                                                                                                                                                                                   |
| Short follow-up period                                            | Jabbour et al, 2013 <sup>16</sup>                                                                                                                                          | Age, sex, aneurysm location, aneurysm size, aneurysm morphology, previous aneurysm treatment, No. of PEDs used per aneurysm, adjunctive coils, balloon angioplasty, early-vs-late groups, procedural complications, angiographic follow-up time    |
| Female                                                            | O'Kelly et al, 2013 <sup>15</sup>                                                                                                                                          | PED No., age, coil use, posterior circulation, maximum diameter, neck diameter, associated thrombus                                                                                                                                                |
| Complete occlusion                                                |                                                                                                                                                                            |                                                                                                                                                                                                                                                    |
| On-label PED use                                                  | Madaelil et al, 2019 <sup>12</sup>                                                                                                                                         |                                                                                                                                                                                                                                                    |
| Left side, hypertension, smoking, without family history          | Liang et al, 2019 <sup>13</sup>                                                                                                                                            |                                                                                                                                                                                                                                                    |
| Morphologic or procedural factors                                 |                                                                                                                                                                            |                                                                                                                                                                                                                                                    |
| Incomplete occlusion                                              |                                                                                                                                                                            |                                                                                                                                                                                                                                                    |
| Fusiform, decreased dome/neck ratio, pre-existing laser-cut stent | Shapiro et al, 2017 <sup>11</sup>                                                                                                                                          | Aneurysm fundus size, neck diameter, multiple PEDs                                                                                                                                                                                                 |
| Large/giant distal ICA aneurysm                                   | Brasiliense et al, 2017 <sup>21</sup>                                                                                                                                      |                                                                                                                                                                                                                                                    |
| Aneurysm previously treated                                       | O'Kelly et al, 2013 <sup>15</sup>                                                                                                                                          |                                                                                                                                                                                                                                                    |
| Fusiform                                                          | Jabbour et al, 2013 <sup>16</sup>                                                                                                                                          | Age, sex, aneurysm location, aneurysm size, aneurysm morphology, previous aneurysm treatment, number of PEDs used per aneurysm, adjunctive coils, balloon angioplasty, early-vs-late groups, procedural complications, angiographic follow-up time |
| Decreasing ASPECTS ratio, increasing neck diameter                | Li et al, 2019 <sup>17</sup>                                                                                                                                               |                                                                                                                                                                                                                                                    |
| Aneurysm with branching artery arising from dome                  | Puffer et al, 2012, <sup>22</sup> Raz et al, 2015, <sup>23</sup> Vedantam et al, 2015, <sup>24</sup> Moshayedi et al, 2017, <sup>25</sup> Volker et al, 2018 <sup>26</sup> | Neck diameter, aneurysm size, prior coil embolization, type (fusiform, saccular, dissection)                                                                                                                                                       |
| Complete occlusion                                                |                                                                                                                                                                            |                                                                                                                                                                                                                                                    |
| Adjunctive coil, multiple devices                                 | Madaelil et al, 2019 <sup>12</sup>                                                                                                                                         |                                                                                                                                                                                                                                                    |
| Small, proximal ICA                                               | Brasiliense et al, 2017 <sup>21</sup>                                                                                                                                      |                                                                                                                                                                                                                                                    |

**Note:**—PcomA indicates posterior communicating artery.
